# Supplementary material for: A novel microporous copper silicate: Na2Cu2Si4O11·2H2O
Source: Royal Society of Chemistry journal article supplement (doi:10.1039/b410731d), 2004-11-18
Supplement: b410731d.pdf [file b410731d.pdf]

# **A Novel Microporous Copper Silicate: $\text{Na}_2\text{Cu}_2\text{Si}_4\text{O}_{11}\cdot 2\text{H}_2\text{O}$**

---

## **Supporting Information**

**Paula Brandão, Filipe A. Almeida Paz and João Rocha\***

*Department of Chemistry, CICECO, University of Aveiro, 3810-193 Aveiro, Portugal  
Fax: +(351) 234 370084; Tel: +(351) 234 370730; E-mail: rocha@dq.ua.pt*

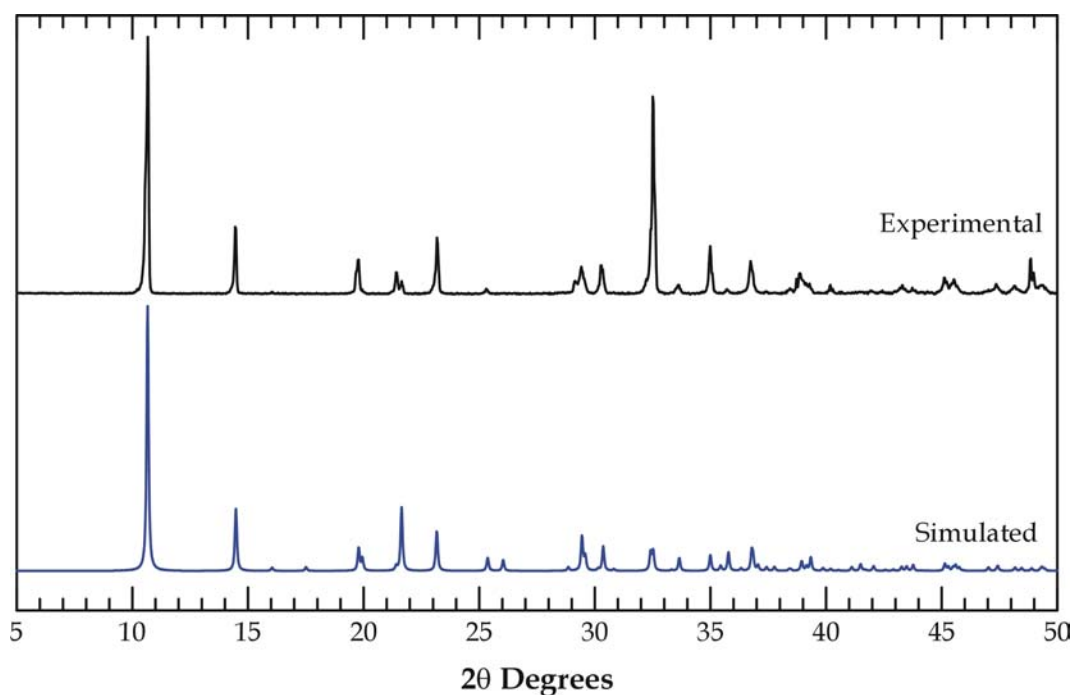

**Fig. S1** Comparison between the experimental (top) and simulated (bottom) powder X-ray patterns for AV-23. Data were collected at ambient temperature using the step counting method (step 0.03°, time 3.5s) on a X'Pert MPD Philips diffractometer (CuK $\alpha$  X-radiation) with a curved graphite monochromator, a fix divergence slit of 1/4°, and a flat plate sample holder, in a Bragg-Brentano para-focusing optics configuration. The simulated powder pattern was based on single-crystal data and calculated using the Mercury Version 1.2 software package from CCDC.

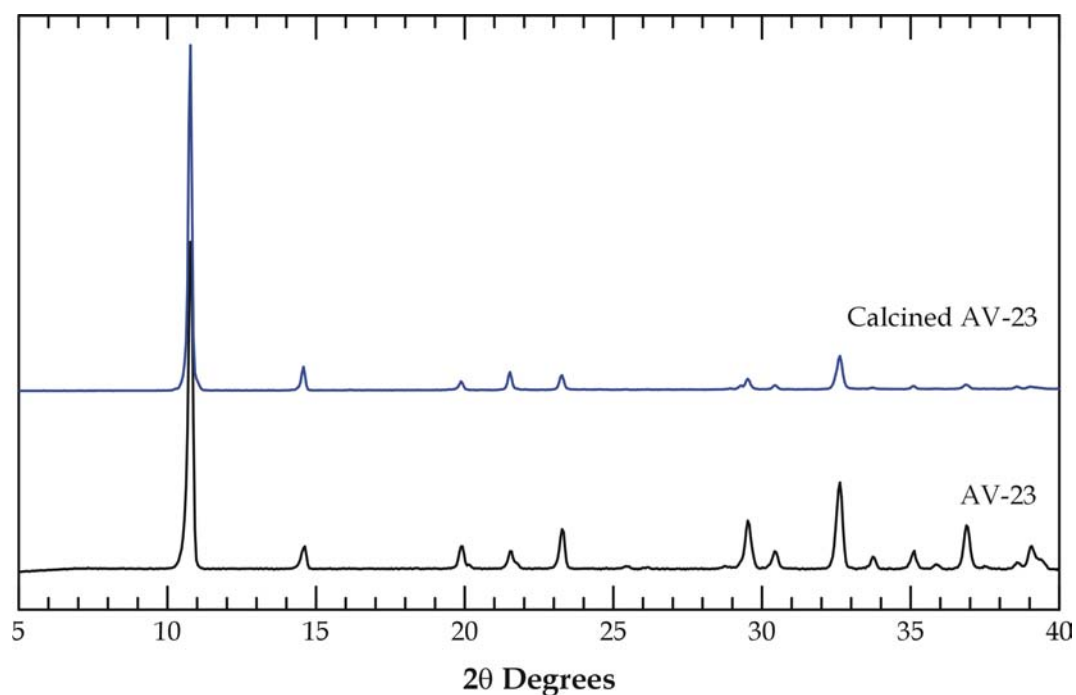

**Fig. S2** Comparison between the powder X-ray patterns for as-synthesised AV-23 and the calcined material at 300 °C for six hours. Data were collected at ambient temperature using the step counting method (step 0.05°, time 1.0s) on a X'Pert MPD Philips diffractometer (CuK $\alpha$

X-radiation) with a curved graphite monochromator, a fix divergence slit of  $1/4^\circ$ , and a flat plate sample holder, in a Bragg-Brentano para-focusing optics configuration.

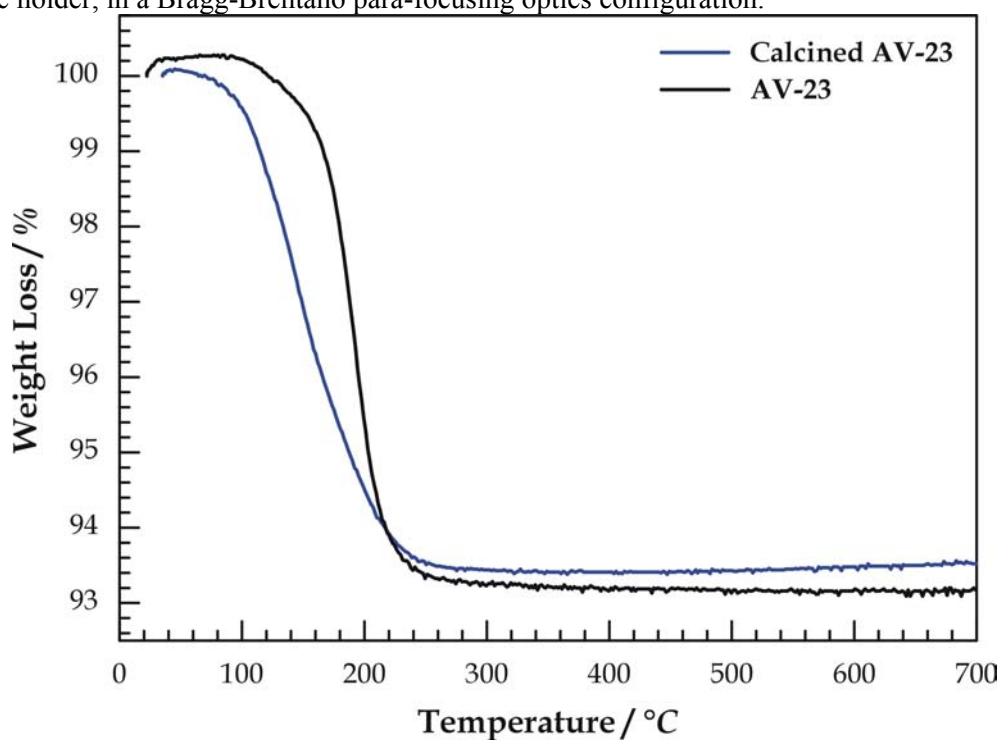

**Fig. S3** Thermogravimetric analysis of as-synthesised and calcined AV-23. Data were measured on a Shimadzu TGA 50, with a heating rate of  $10^\circ\text{C}/\text{min}$ , under nitrogen atmosphere with flow rate of  $20\text{ cm}^3/\text{min}$ .
